# Supplementary material for: On Identifying and Explaining Similarities in Android Apps
Source: Springer Nature journal article supplement (doi:10.1007/s11390-019-1918-8), 2019-03-01
Supplement: 11390_2019_1918_MOESM1_ESM.pdf [file 11390_2019_1918_MOESM1_ESM.pdf]

# On Identifying and Explaining Similarities in Android Apps

Li LI, Tegawend éF. Bissyand é, Haoyu  
Wang, and Jacques Klein

Li L, Bissyande TF, Wang HY et al. On identifying and explaining similarities in Android apps. JOURNAL OF COMPUTER SCIENCE AND TECHNOLOGY 34(2): 437-455 Mar. 2019. DOI 10.1007/s11390-019-1918-8

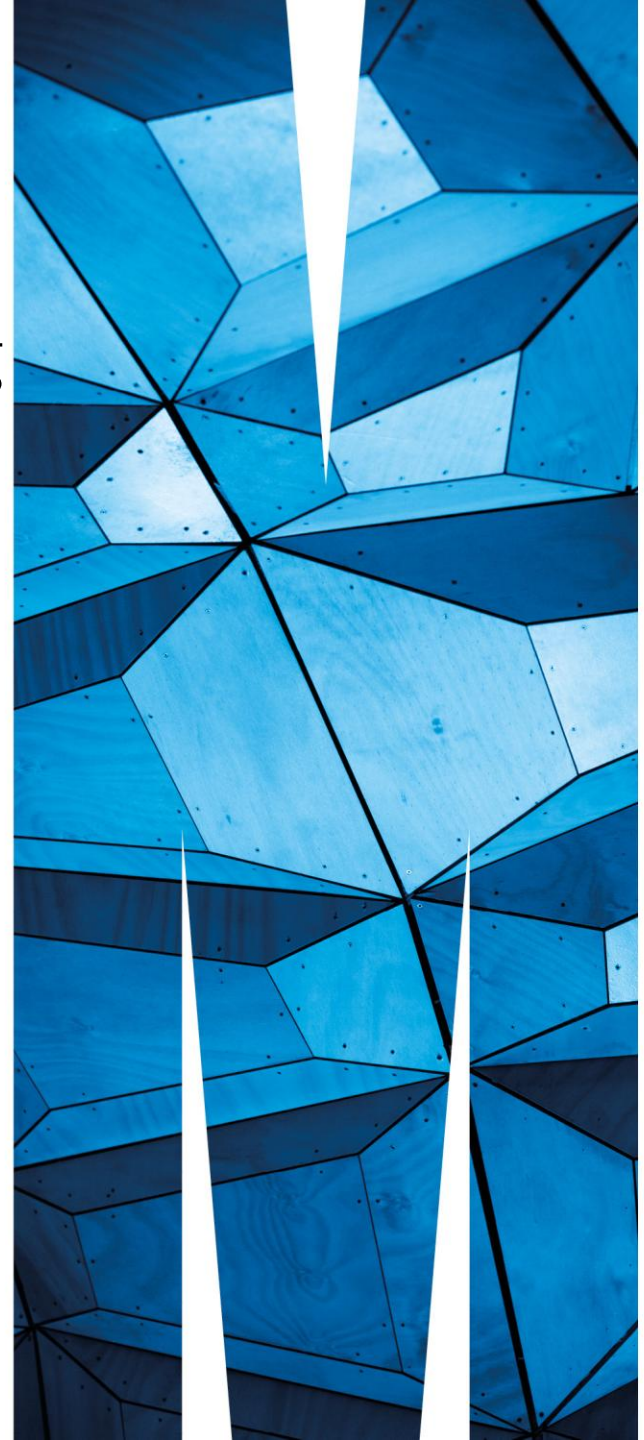

- Identifying Similar Android Apps
- Explaining Similarities

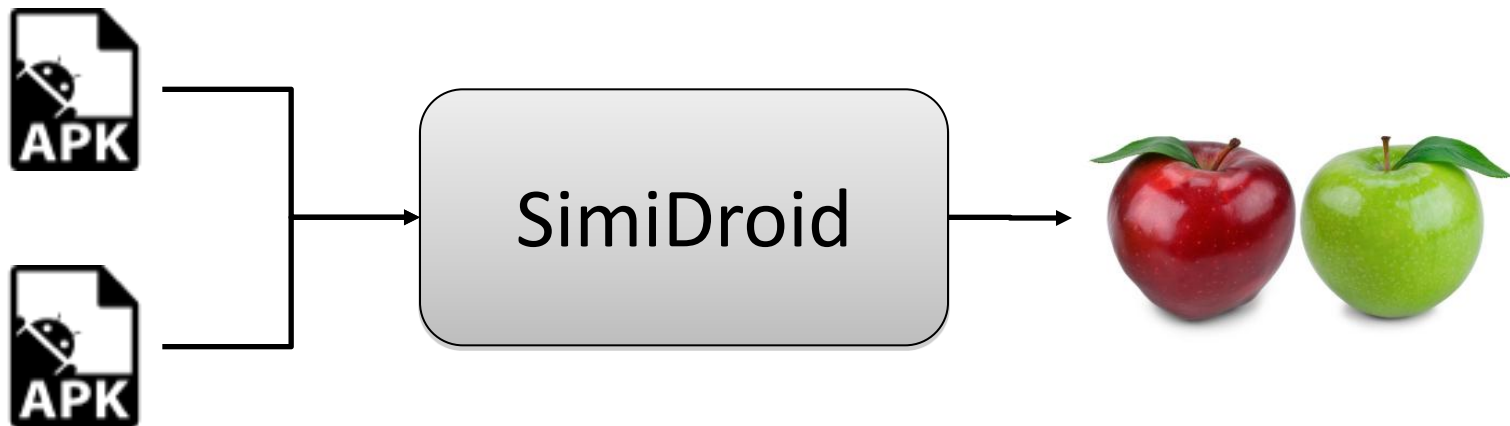

## Plugin-based Framework

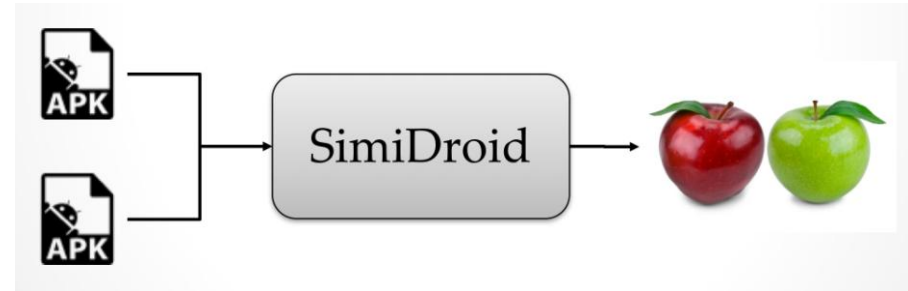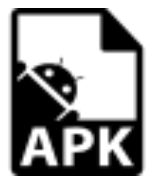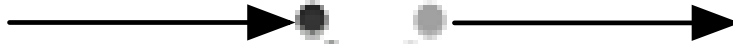

Plugin<sub>1</sub>

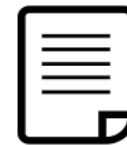

key<sub>1</sub> --> Value<sub>1</sub>

... ..  
key<sub>n</sub> --> Value<sub>n</sub>

***key/value concrete example:***

key: `setSortOrderSummary()`

value: `{InvokeStmt, AssignStmt|0, InvokeStmt|2131099690}`

## Method

## Component

## Resource

### Method-based Comparison

```
$r3 = $r1.getEntry();
```

```
$r2[0] = $r3;
```

```
$r4 = $r0.getString(2131099690,$2);
```

```
$r3 = $r1.getEntry();
```

```
$r2[0] = $r3;
```

```
$r4 = $r0.getString(2131034217,$2);
```

|                              |           |                              |
|------------------------------|-----------|------------------------------|
| <b>InvokeStmt</b>            | <b>==</b> | <b>InvokeStmt</b>            |
| <b>AssignStmt 0</b>          | <b>==</b> | <b>AssignStmt 0</b>          |
| <b>InvokeStmt 2131099690</b> | <b>!=</b> | <b>InvokeStmt 2131034217</b> |

### Components Comparison

```
activity:bander.fileman.TextViewer
```

```
android.intent.action.EDIT:android.intent.action.VIEW
```

```
==
```

```
activity:bander.fileman.TextViewer
```

```
android.intent.action.EDIT:android.intent.action.VIEW
```

### Resources Comparison

```
res/layout/main.xml
```

```
E40448C6ECED431A2FCC20017CCDE920
```

```
!=
```

```
0240F5D10CA2140B9D3866247A2FE5D3
```

```
res/layout/main.xml
```

- We present the design and implementation of SimiDroid, contributing to the community with a reusable tool for detecting similar Android apps and explaining the identified similarities at different levels.
- We have implemented several similarity comparison methods as plugins for the current release of SimiDroid.
- We investigate a number of case studies on real-world apps to demonstrate the suitability of SimiDroid in providing explanation hints for different usage scenarios.
